# Supplementary material
Source: publisher figshare collection journal article supplement (https://tandf.figshare.com/ndownloader/files/16765508)
Supplement: Supplementary file 1 [file 16765508]

**Two new tanshinone diterpene derivatives from the rhizomes of *Salvia miltiorrhiza* and their antiviral activities**

Zhao-Kun Yin, Zi-Ming Feng, Jian-Shuang Jiang, Xu Zhang, Pei-Cheng Zhang*, and Ya-Nan Yang*

*State Key Laboratory of Bioactive Substance and Function of Natural Medicines, Peking Union Medical College and Institute of Materia Medica, Chinese Academy of Medical Sciences, Beijing 100050, China*

**Supporting Information**

**Table of Contents**

[**Figure S1.** 1H NMR spectrum of compound 1 in CDCl3 (500MHz) 1](#_Toc6922526)

[**Figure S2.** 13C NMR spectrum of compound 1 in CDCl3 (125 MHz) 1](#_Toc6922527)

[**Figure S3.** HSQC spectrum of compound 1 in CDCl3 (500MHz) 2](#_Toc6922528)

[**Figure S4.** HMBC spectrum of compound 1 in CDCl3 (500MHz) 2](#_Toc6922529)

[**Figure S5.** UV spectrum of compound 1 3](#_Toc6922530)

[**Figure S6.** IR spectrum of compound 1 3](#_Toc6922531)

[**Figure S7.** HR-ESI-MS spectrum of compound 1 4](#_Toc6922532)

[**Figure S8.** 1H NMR spectrum of compound 2 in CDCl3 (500MHz) 5](#_Toc6922533)

[**Figure S9.** 13C NMR spectrum of compound 2 in CDCl3 (125MHz) 5](#_Toc6922534)

[**Figure S10.** HSQC spectrum of compound 2 in CDCl3 (500MHz) 6](#_Toc6922535)

[**Figure S11.** HMBC spectrum of compound 2 in CDCl3 (500MHz) 6](#_Toc6922536)

[**Figure S12.** UV spectrum of compound 2 7](#_Toc6922537)

[**Figure S13.** IR spectrum of compound 2 7](#_Toc6922538)

[**Figure S14.** HR-ESI-MS spectrum of compound 2 8](#_Toc6922539)


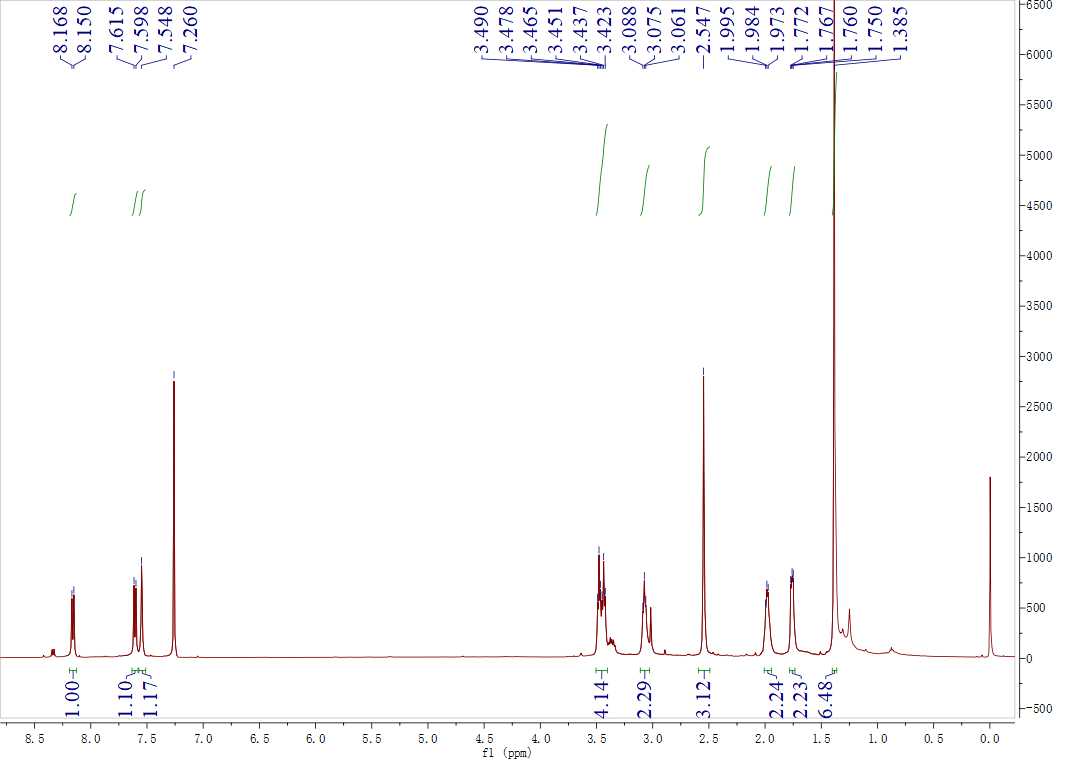


## Figure S1. 1H NMR spectrum of compound **1** in CDCl3 (500MHz)


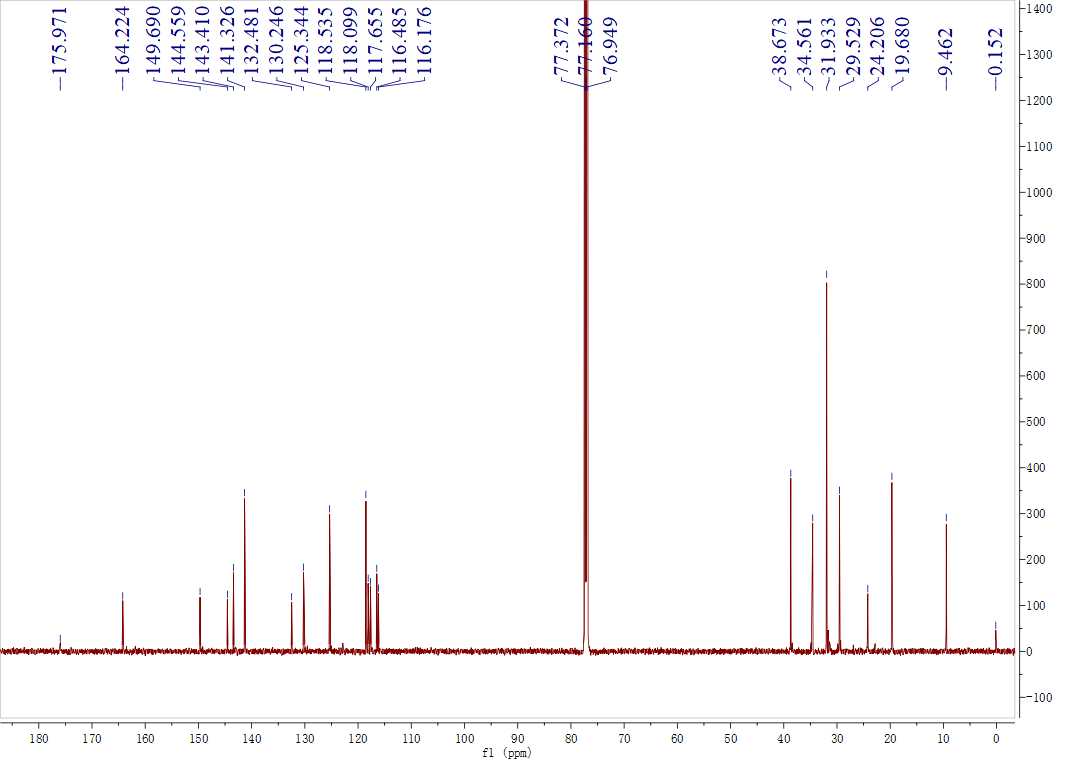


## Figure S2. 13C NMR spectrum of compound **1** in CDCl3 (125 MHz)


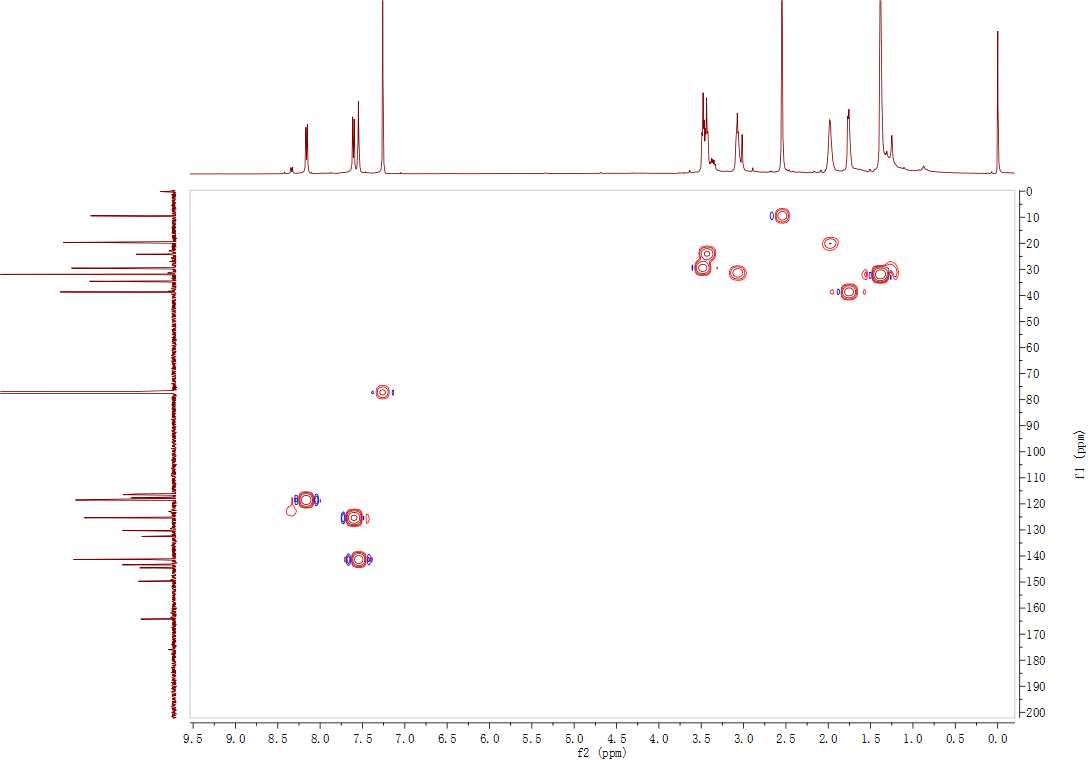


## Figure S3. HSQC spectrum of compound **1** in CDCl3 (500MHz)


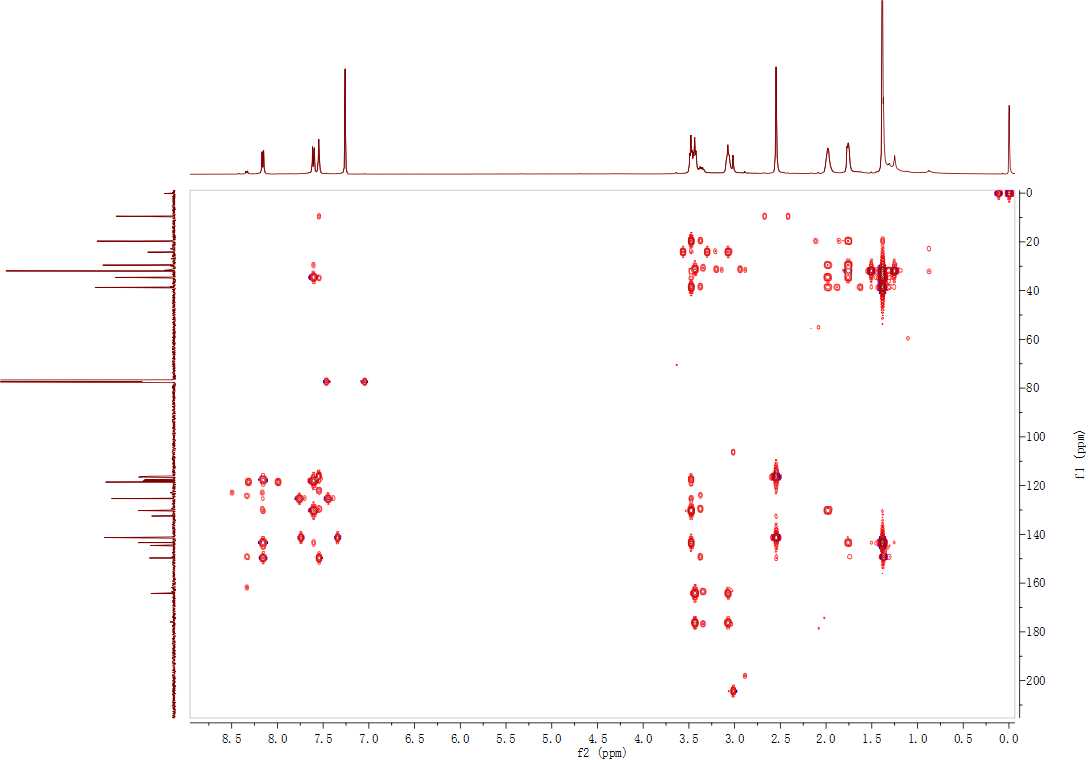


## Figure S4. HMBC spectrum of compound **1** in CDCl3 (500MHz)


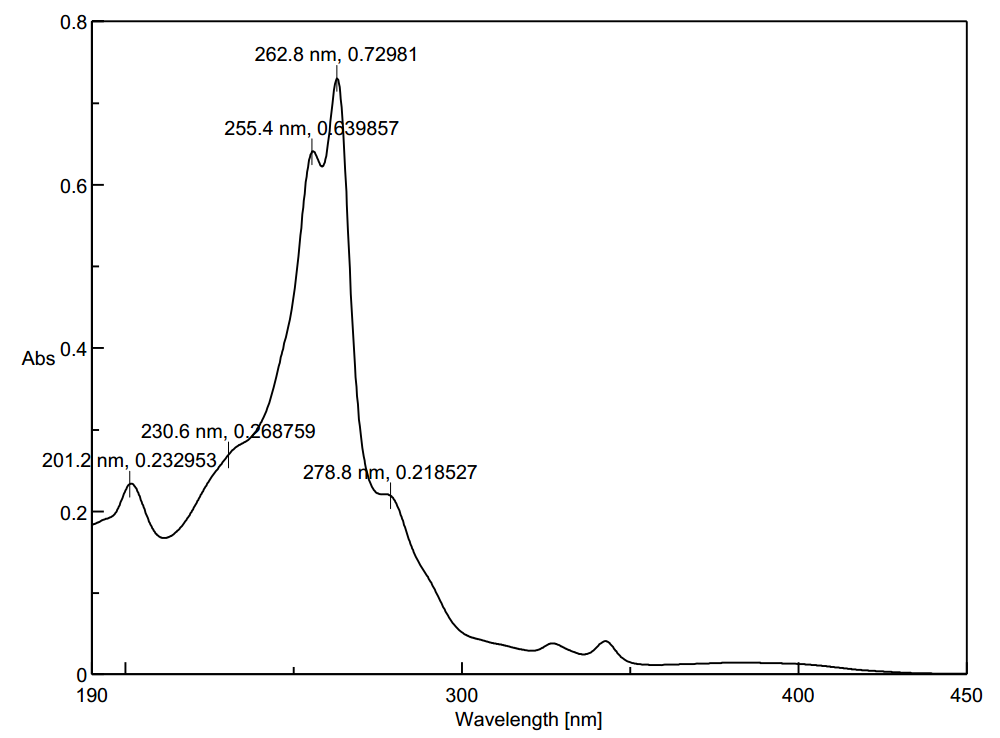


## Figure S5. UV spectrum of compound **1**

**
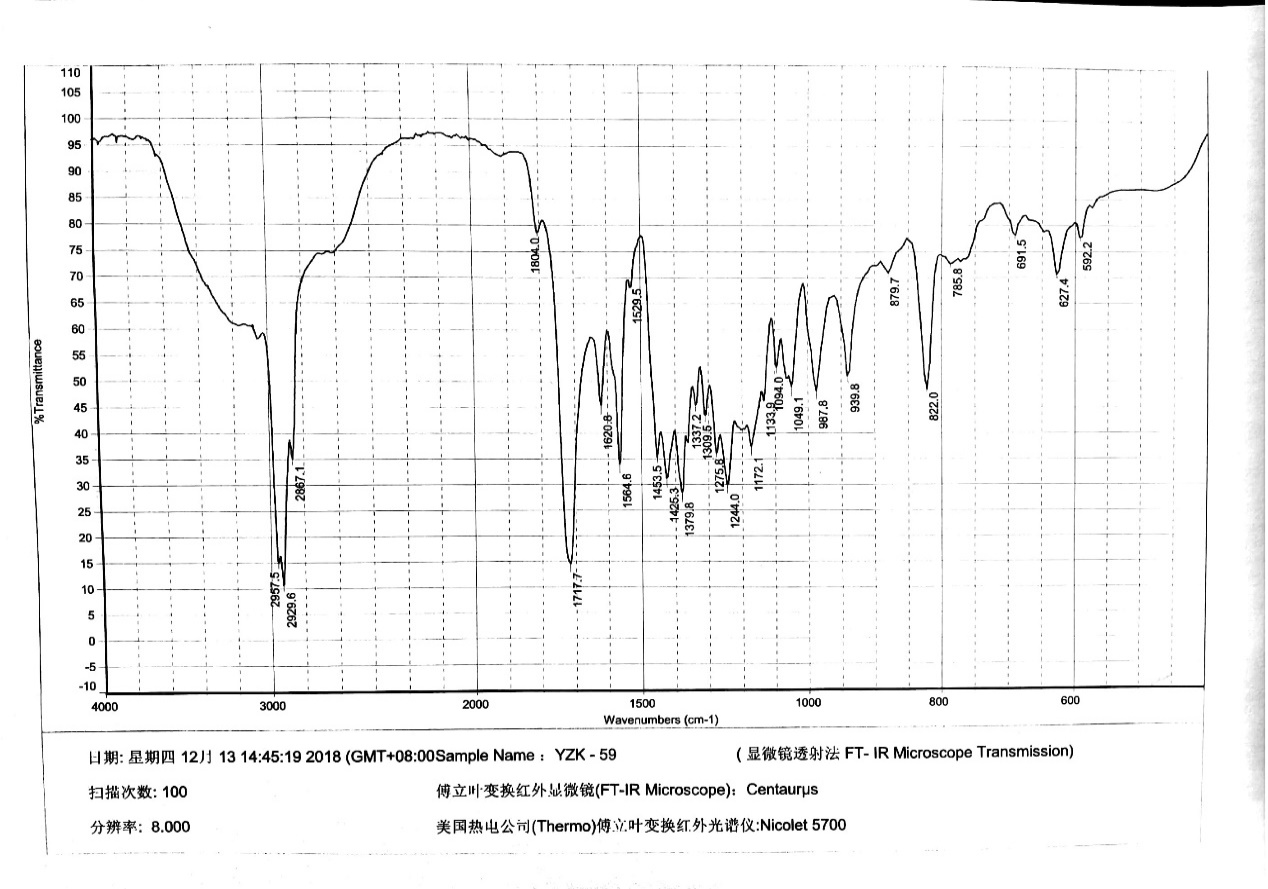
**

## Figure S6. IR spectrum of compound **1**

**
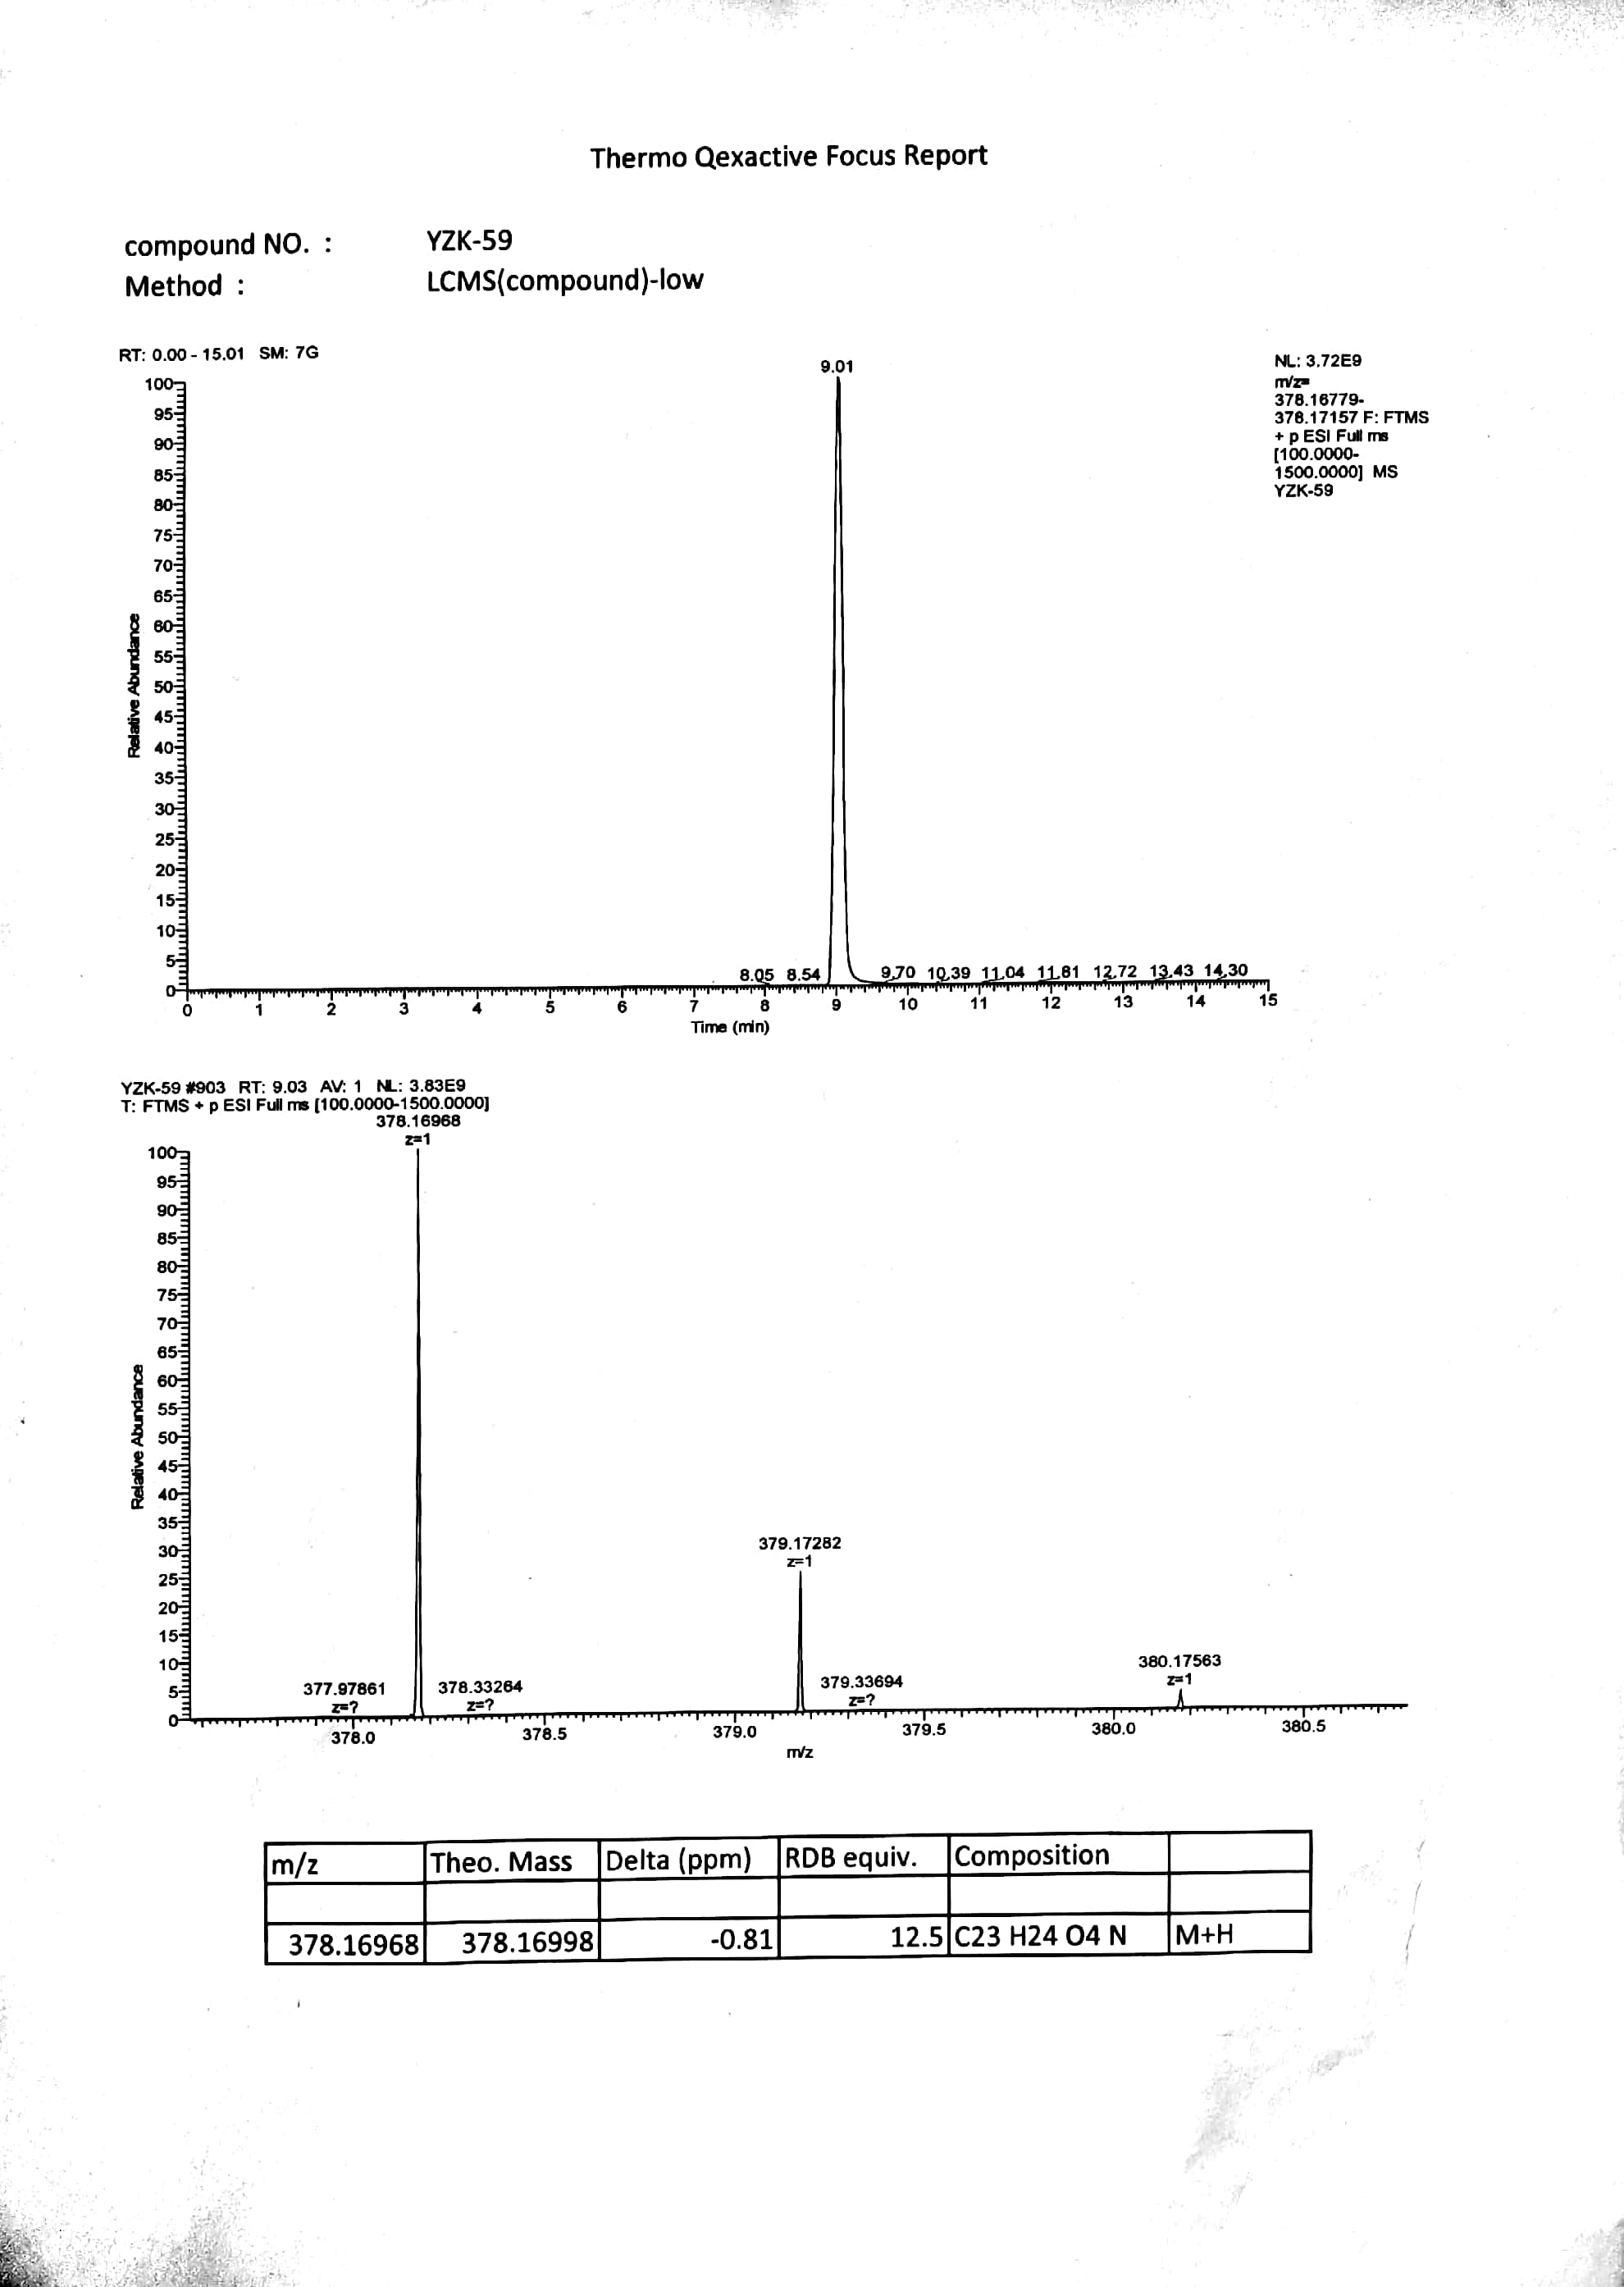
**

## Figure S7. HR-ESI-MS spectrum of compound **1**

**
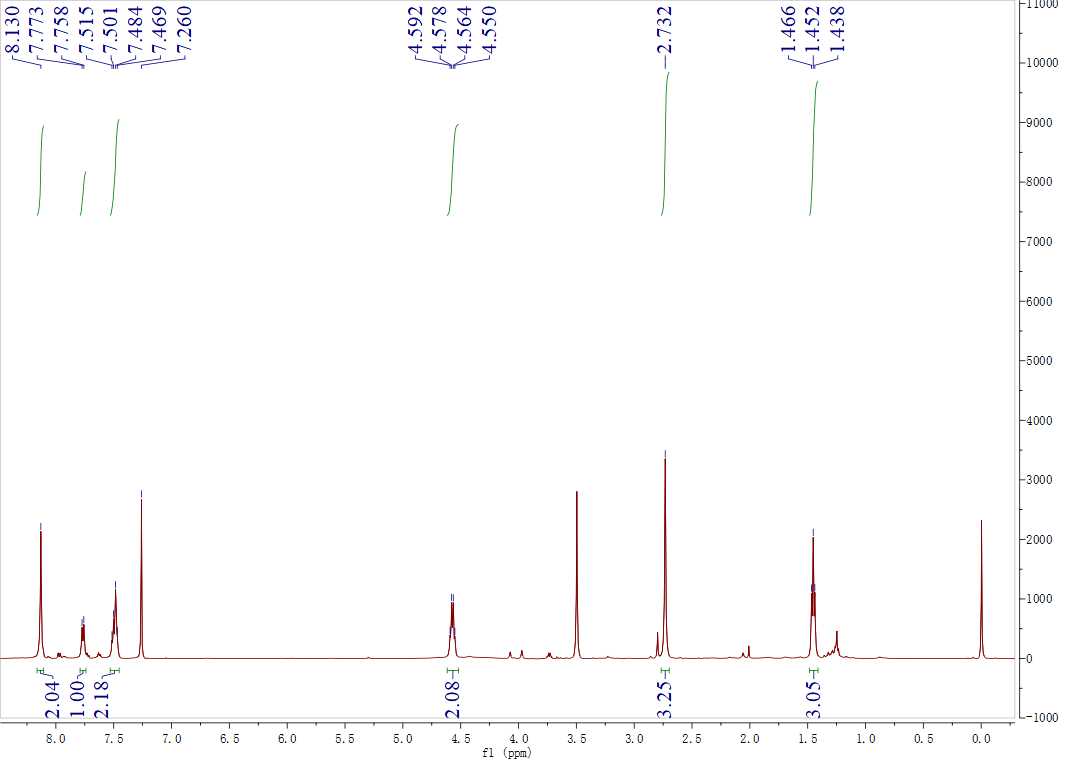
**

## Figure S8. 1H NMR spectrum of compound **2** in CDCl3 (500MHz)


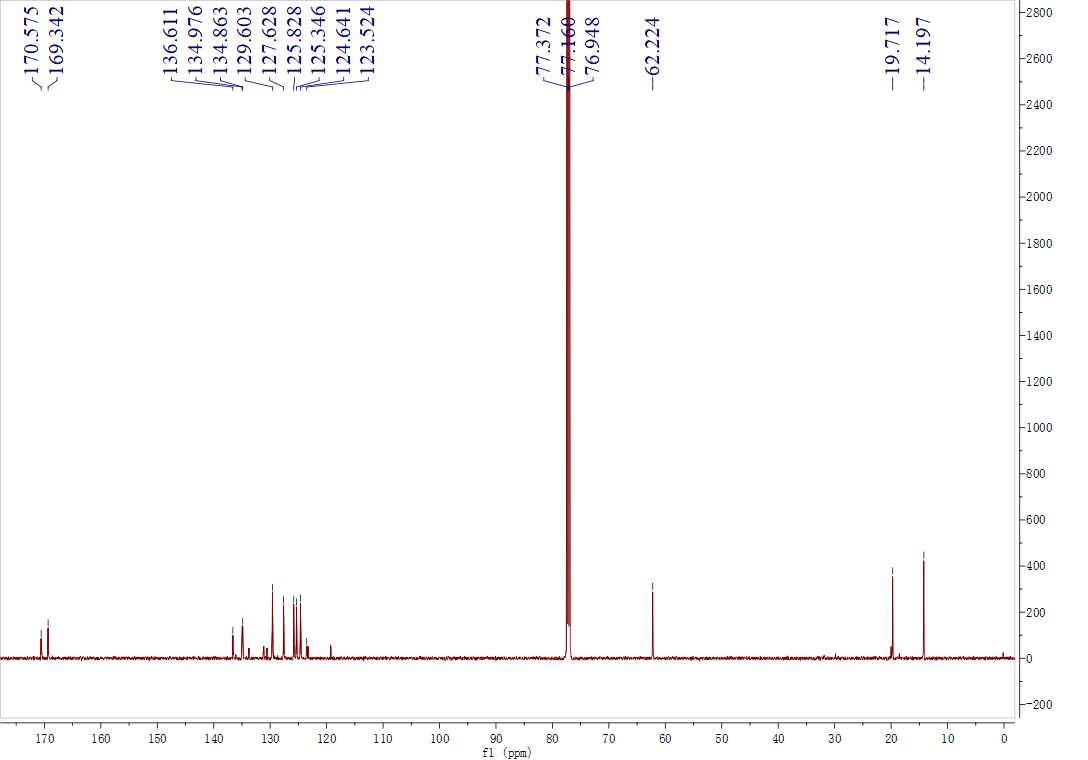


## Figure S9. 13C NMR spectrum of compound **2** in CDCl3 (125MHz)


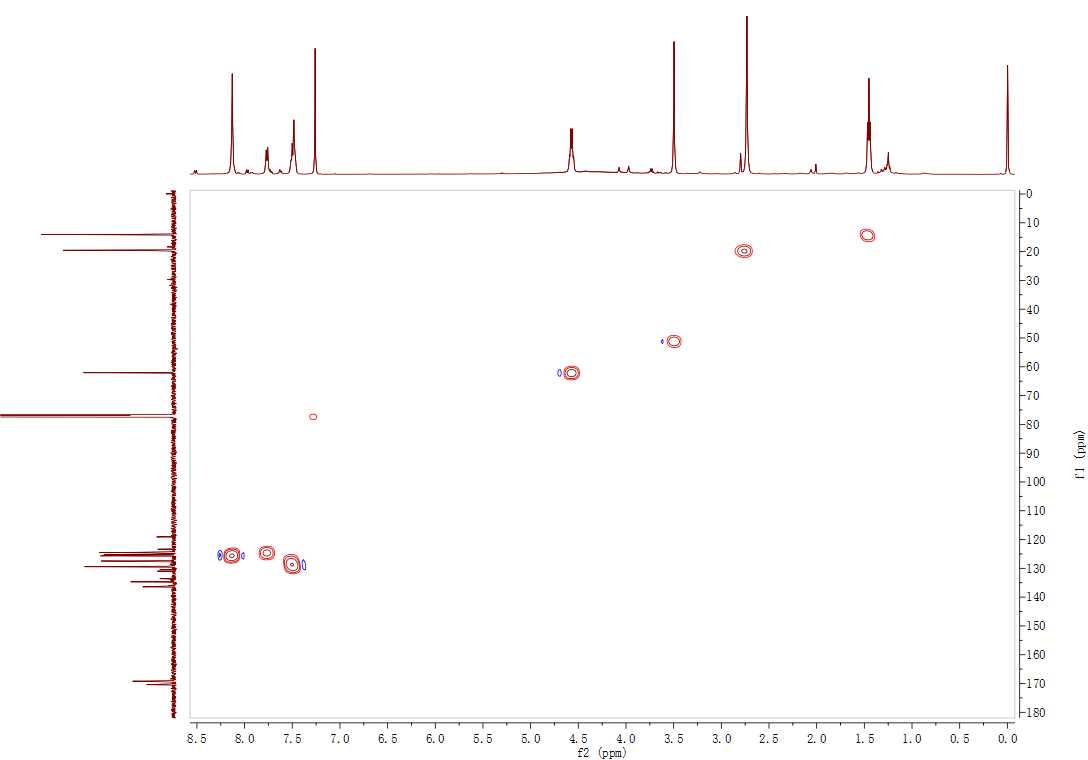


## Figure S10. HSQC spectrum of compound **2** in CDCl3 (500MHz)


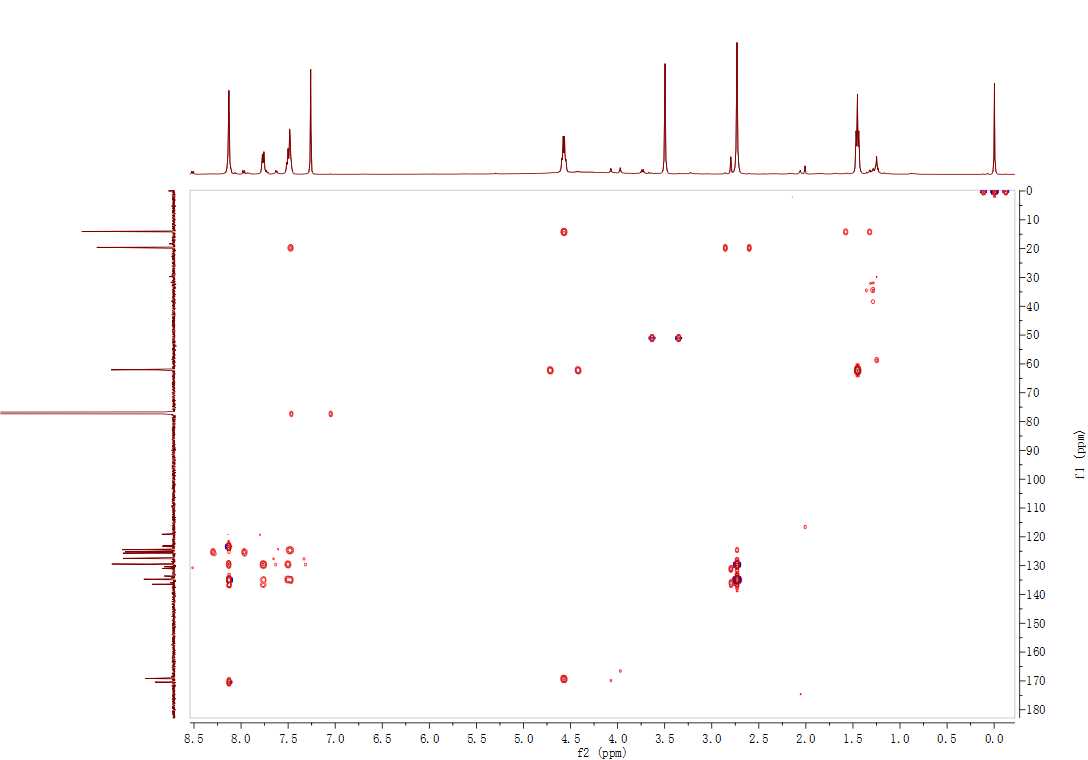


## Figure S11. HMBC spectrum of compound **2** in CDCl3 (500MHz)


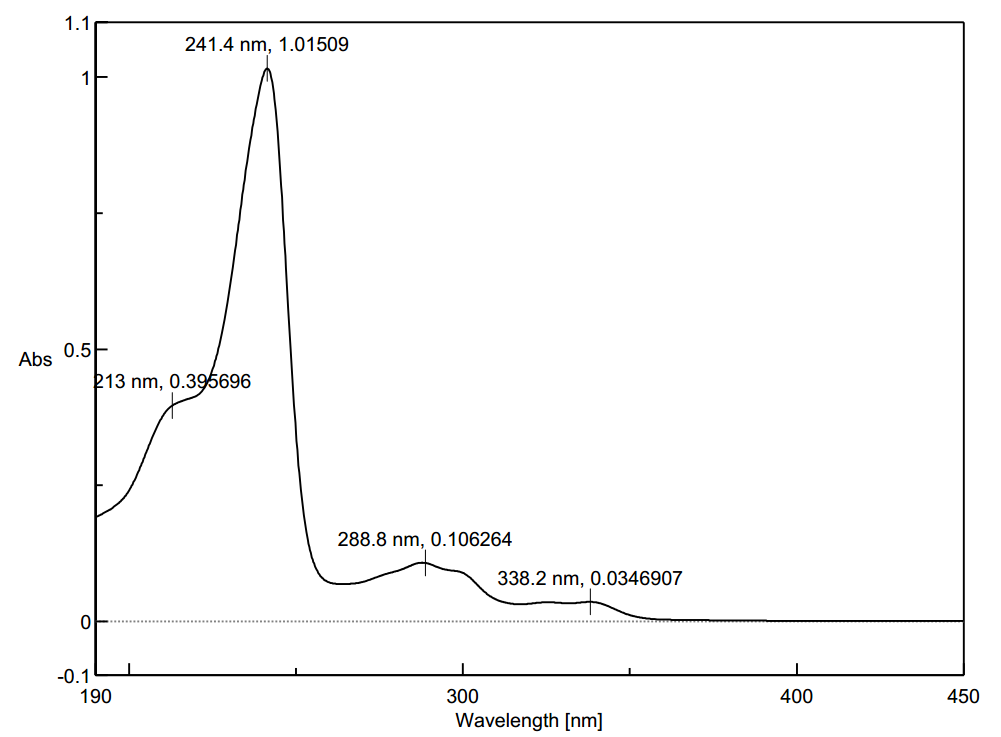


## Figure S12. UV spectrum of compound **2**

**
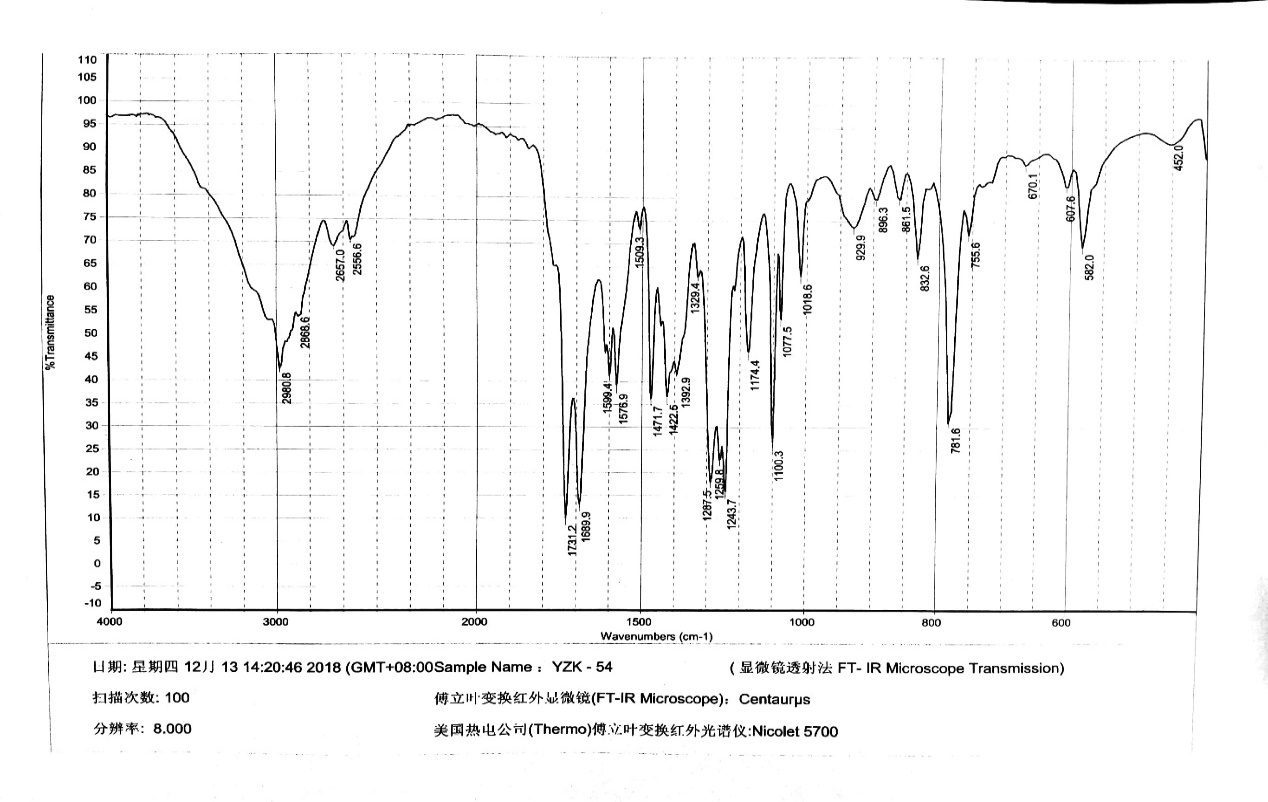
**

## Figure S13. IR spectrum of compound **2**

**
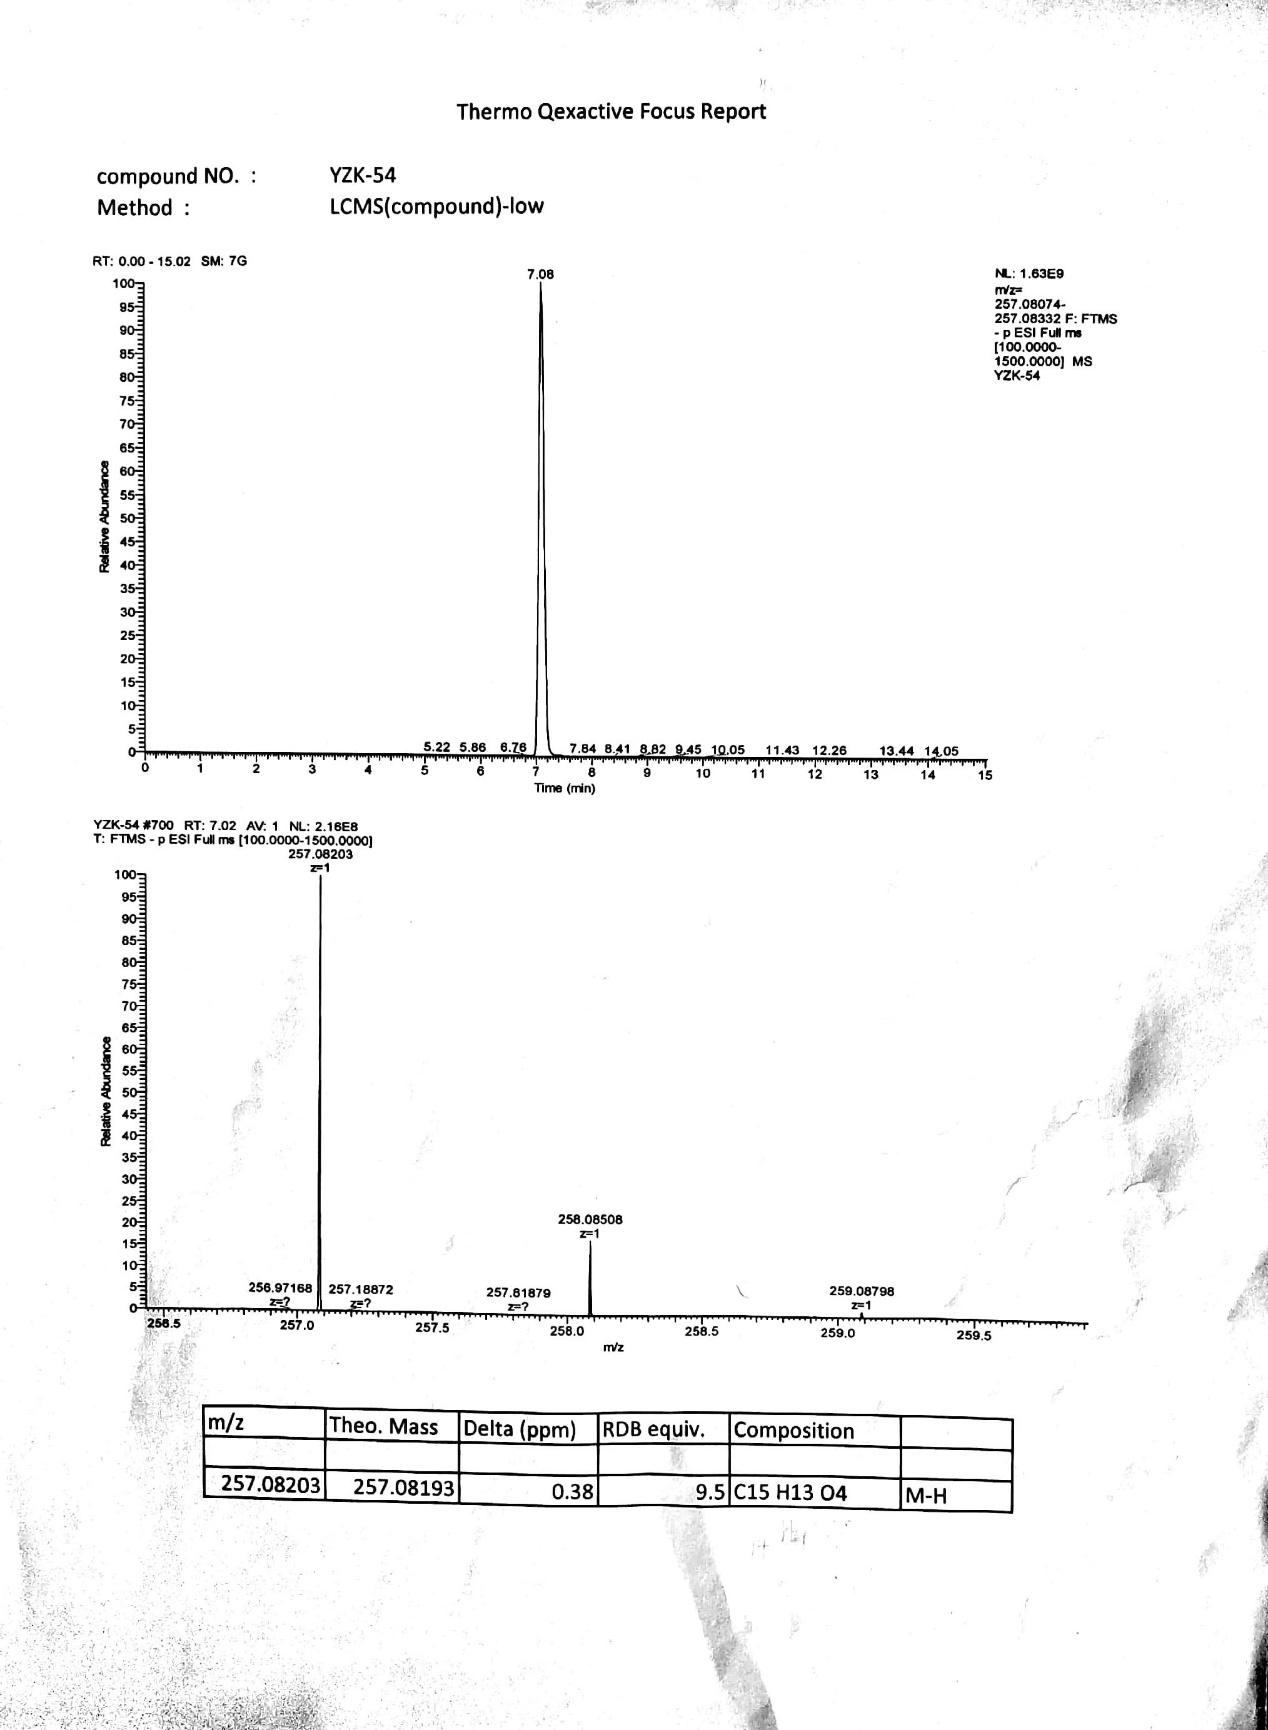
**

## Figure S14. HR-ESI-MS spectrum of compound **2**
